# Supplementary material
Source: PubMed Central journal article supplement (PMC5328516)
Supplement: AAC.02256-16_zac003175973s1.pdf [file AAC.02256-16_zac003175973s1.pdf]

**TABLE S1** RNA-seq analysis in the *orn* mutant relative to wild-type

| Locus Tag  | Locus Tag | Name        | Product                              | Fold Change<br><i>orn</i> vs. PA14 | <i>P</i> value |
|------------|-----------|-------------|--------------------------------------|------------------------------------|----------------|
| PA14_00230 | PA0021    |             | conserved hypothetical protein       | 5.101                              | 1.648E-04      |
| PA14_01250 | PA0103    |             | probable sulfate transporter         | 2.361                              | 4.682E-03      |
| PA14_01290 | PA0105    | <i>coxB</i> | cytochrome c oxidase, subunit II     | 2.472                              | 3.448E-02      |
| PA14_02060 | PA0165    |             | hypothetical protein                 | 2.506                              | 9.258E-08      |
| PA14_02110 | PA0169    |             | SiaD                                 | 5.309                              | 1.999E-20      |
| PA14_02130 | PA0170    |             | hypothetical protein                 | 9.237                              | 1.812E-25      |
| PA14_02140 | PA0171    |             | hypothetical protein                 | 9.757                              | 7.436E-26      |
| PA14_02150 | PA0172    |             | SiaA                                 | 14.947                             | 1.155E-44      |
| PA14_02550 | PA0208    | <i>mdcA</i> | malonate decarboxylase alpha subunit | 5.456                              | 1.343E-14      |
| PA14_04060 | PA0311    |             | hypothetical protein                 | 3.893                              | 8.430E-06      |
| PA14_04610 | PA0352    |             | probable transporter                 | 3.341                              | 2.725E-09      |
| PA14_05080 | PA0390    | <i>metX</i> | homoserine O-acetyltransferase       | 3.207                              | 8.977E-14      |
| PA14_06180 | PA0472    |             | FiuI                                 | 7.702                              | 9.145E-03      |
| PA14_07550 | PA0578    |             | conserved hypothetical protein       | 9.839                              | 7.675E-13      |
| PA14_07560 | PA0579    | <i>rpsU</i> | 30S ribosomal protein S21            | 6.303                              | 2.384E-04      |
| PA14_07860 | PA0603    |             | AgtA                                 | 5.188                              | 1.135E-06      |
| PA14_07870 | PA0604    |             | AgtB                                 | 4.283                              | 6.158E-06      |
| PA14_07970 | PA0612    |             | repressor, PtrB                      | 3.053                              | 1.892E-03      |
| PA14_07980 | PA0613    |             | hypothetical protein                 | 3.238                              | 6.263E-11      |
| PA14_07980 | PA0615    |             | hypothetical protein                 | 3.585                              | 2.459E-12      |

---

|            |        |                                |       |           |
|------------|--------|--------------------------------|-------|-----------|
| 08000      |        |                                |       |           |
| PA14_08010 | PA0616 | hypothetical protein           | 3.695 | 1.222E-08 |
| PA14_08020 | PA0617 | probable bacteriophage protein | 3.709 | 2.966E-09 |
| PA14_08030 | PA0618 | probable bacteriophage protein | 3.664 | 1.997E-08 |
| PA14_08040 | PA0619 | probable bacteriophage protein | 3.626 | 3.419E-13 |
| PA14_08050 | PA0620 | probable bacteriophage protein | 2.924 | 2.020E-10 |
| PA14_08060 | PA0621 | conserved hypothetical protein | 2.376 | 4.971E-05 |
| PA14_08070 | PA0622 | probable bacteriophage protein | 3.234 | 5.329E-12 |
| PA14_08090 | PA0623 | probable bacteriophage protein | 2.999 | 1.919E-10 |
| PA14_08100 | PA0624 | hypothetical protein           | 3.342 | 8.559E-11 |
| PA14_08120 | PA0625 | hypothetical protein           | 3.299 | 8.352E-09 |
| PA14_08130 | PA0626 | hypothetical protein           | 3.377 | 3.302E-05 |
| PA14_08140 | PA0627 | conserved hypothetical protein | 3.108 | 3.297E-08 |
| PA14_08150 | PA0628 | conserved hypothetical protein | 3.385 | 5.495E-08 |
| PA14_08160 | PA0629 | conserved hypothetical protein | 3.689 | 6.944E-07 |
| PA14_08180 | PA0630 | hypothetical protein           | 4.223 | 2.695E-07 |
| PA14_08200 | PA0632 | hypothetical protein           | 3.000 | 4.495E-06 |
| PA14_08210 | PA0633 | hypothetical protein           | 2.824 | 4.475E-09 |
| PA14_08220 | PA0634 | hypothetical protein           | 2.740 | 1.271E-08 |
| PA14_08230 | PA0635 | hypothetical protein           | 2.783 | 3.407E-06 |
| PA14_08240 | PA0636 | hypothetical protein           | 3.454 | 8.654E-11 |
| PA14_08250 | PA0637 | conserved hypothetical protein | 3.444 | 2.532E-07 |
| PA14_08250 | PA0638 | probable bacteriophage protein | 3.536 | 3.414E-12 |

---

|            |        |              |                                              |       |           |
|------------|--------|--------------|----------------------------------------------|-------|-----------|
| 08260      |        |              | protein                                      |       |           |
| PA14_08270 | PA0639 |              | conserved hypothetical protein               | 3.671 | 1.092E-05 |
| PA14_08280 | PA0640 |              | probable bacteriophage protein               | 3.381 | 1.612E-08 |
| PA14_08300 | PA0641 |              | probable bacteriophage protein               | 3.265 | 7.846E-09 |
| PA14_08310 | PA0646 |              | hypothetical protein                         | 2.102 | 3.484E-06 |
| PA14_08320 | PA0647 |              | hypothetical protein                         | 2.249 | 1.848E-05 |
| PA14_08330 | PA0648 |              | hypothetical protein                         | 2.002 | 5.818E-05 |
| PA14_08390 | PA0654 | <i>speD</i>  | S-adenosylmethionine decarboxylase proenzyme | 3.524 | 7.411E-11 |
| PA14_54740 | PA0737 |              | hypothetical protein                         | 9.442 | 7.727E-03 |
| PA14_54260 | PA0775 |              | conserved hypothetical protein               | 4.251 | 1.402E-16 |
| PA14_54030 | PA0790 |              | hypothetical protein                         | 2.875 | 3.866E-02 |
| PA14_53090 | PA0864 |              | probable transcriptional regulator           | 2.355 | 2.813E-03 |
| PA14_53050 | PA0866 | <i>aroP2</i> | aromatic amino acid transport protein AroP2  | 2.013 | 4.447E-02 |
| PA14_52510 | PA0908 |              | hypothetical protein                         | 4.708 | 2.558E-12 |
| PA14_52500 | PA0909 |              | hypothetical protein                         | 3.955 | 4.211E-02 |
| PA14_52480 | PA0911 |              | hypothetical protein                         | 2.696 | 5.779E-07 |
| PA14_52440 | PA0914 |              | hypothetical protein                         | 6.584 | 1.097E-10 |
| PA14_52430 | PA0915 |              | conserved hypothetical protein               | 8.199 | 4.295E-14 |
| PA14_52420 | PA0916 | <i>rimO</i>  | conserved hypothetical protein               | 5.841 | 3.361E-25 |
| PA14_52250 | PA0929 |              | two-component response regulator             | 4.352 | 3.696E-08 |
| PA14_52010 | PA0947 |              | conserved hypothetical protein               | 3.775 | 3.767E-14 |
| PA14_51680 | PA0975 |              | probable radical activating enzyme           | 7.416 | 2.445E-07 |

|            |        |             |                                                          |        |           |
|------------|--------|-------------|----------------------------------------------------------|--------|-----------|
| PA14_59220 | PA0985 |             | pyocin S5                                                | 2.337  | 6.858E-07 |
| PA14_50100 | PA1104 | <i>fliI</i> | flagellum-specific ATP synthase FliI                     | 2.476  | 8.511E-09 |
| PA14_48850 | PA1194 |             | probable amino acid permease                             | 2.024  | 8.398E-03 |
| PA14_48410 | PA1227 |             | hypothetical protein                                     | 4.226  | 8.372E-13 |
| PA14_48400 | PA1228 |             | hypothetical protein                                     | 5.543  | 1.968E-10 |
| PA14_47410 | PA1299 |             | conserved hypothetical protein                           | 4.877  | 9.689E-07 |
| PA14_47400 | PA1300 |             | ECF sigma factor                                         | 17.351 | 4.531E-02 |
| PA14_46250 | PA1407 |             | hypothetical protein                                     | 5.989  | 2.395E-18 |
| PA14_46120 | PA1417 |             | probable decarboxylase                                   | 4.070  | 1.441E-03 |
| PA14_46080 | PA1420 |             | hypothetical protein                                     | 3.698  | 2.781E-05 |
| PA14_46070 | PA1421 | <i>gbuA</i> | guanidinobutyrase                                        | 4.105  | 3.624E-03 |
| PA14_44520 | PA1541 |             | probable drug efflux transporter                         | 4.555  | 1.190E-03 |
| PA14_43730 | PA1606 |             | hypothetical protein                                     | 2.446  | 3.608E-02 |
| PA14_43405 | PA1632 | <i>kdbF</i> | KdpF protein                                             | 77.446 | 3.276E-04 |
| PA14_43400 | PA1633 | <i>kdpA</i> | potassium-transporting ATPase, A chain                   | 17.827 | 8.614E-03 |
| PA14_43380 | PA1634 | <i>kdpB</i> | potassium-transporting ATPase, B chain                   | 9.506  | 8.172E-03 |
| PA14_43370 | PA1635 | <i>kdpC</i> | potassium-transporting ATPase, C chain                   | 11.240 | 6.157E-03 |
| PA14_42660 | PA1690 | <i>pscU</i> | translocation protein in type III secretion              | 2.342  | 5.296E-06 |
| PA14_42640 | PA1691 | <i>pscT</i> | translocation protein in type III secretion              | 3.324  | 8.139E-07 |
| PA14_42580 | PA1696 | <i>pscO</i> | translocation protein in type III secretion              | 2.244  | 5.274E-03 |
| PA14_42550 | PA1698 | <i>popN</i> | Type III secretion outer membrane protein PopN precursor | 3.691  | 4.085E-07 |
| PA14_42550 | PA1699 |             | Pcr1                                                     | 2.533  | 2.056E-05 |

---

|            |        |             |                                                          |       |           |
|------------|--------|-------------|----------------------------------------------------------|-------|-----------|
| 42540      |        |             |                                                          |       |           |
| PA14_42530 | PA1700 |             | Pcr2                                                     | 2.748 | 2.813E-03 |
| PA14_42520 | PA1701 |             | Pcr3                                                     | 4.077 | 4.617E-07 |
| PA14_42510 | PA1702 |             | Pcr4                                                     | 2.559 | 2.308E-02 |
| PA14_42500 | PA1703 | <i>pcrD</i> | type III secretory apparatus protein PcrD                | 2.219 | 1.344E-06 |
| PA14_42480 | PA1705 | <i>pcrG</i> | regulator in type III secretion                          | 3.484 | 1.456E-03 |
| PA14_42400 | PA1712 | <i>exsB</i> | exoenzyme S synthesis protein B                          | 2.345 | 3.921E-05 |
| PA14_42390 | PA1713 | <i>exsA</i> | transcriptional regulator ExsA                           | 3.093 | 1.289E-11 |
| PA14_42380 | PA1714 |             | ExsD                                                     | 2.345 | 3.234E-04 |
| PA14_42360 | PA1715 | <i>pscB</i> | type III export apparatus protein                        | 3.581 | 1.959E-08 |
| PA14_42350 | PA1716 | <i>pscC</i> | Type III secretion outer membrane protein PscC precursor | 2.292 | 4.198E-07 |
| PA14_42340 | PA1717 | <i>pscD</i> | type III export protein PscD                             | 2.278 | 1.625E-03 |
| PA14_42270 | PA1723 | <i>pscJ</i> | type III export protein PscJ                             | 2.090 | 1.810E-05 |
| PA14_42260 | PA1724 | <i>pscK</i> | type III export protein PscK                             | 3.598 | 1.779E-09 |
| PA14_42250 | PA1725 | <i>pscL</i> | type III export protein PscL                             | 2.801 | 2.644E-09 |
| PA14_41650 | PA1771 |             | EstX                                                     | 2.079 | 2.334E-04 |
| PA14_41563 | PA1778 | <i>cobA</i> | uroporphyrin-III C-methyltransferase                     | 2.309 | 4.991E-04 |
| PA14_41430 | PA1790 |             | hypothetical protein                                     | 2.311 | 3.229E-06 |
| PA14_40540 | PA1854 |             | conserved hypothetical protein                           | 4.041 | 8.204E-09 |
| PA14_40520 | PA1855 |             | hypothetical protein                                     | 4.618 | 7.524E-03 |
| PA14_39360 | PA1945 |             | probable transcriptional regulator                       | 2.718 | 1.519E-04 |
| PA14_39190 | PA1959 | <i>bacA</i> | bacitracin resistance protein                            | 2.577 | 2.166E-05 |

---

|            |        |             |                                                                                                   |        |           |
|------------|--------|-------------|---------------------------------------------------------------------------------------------------|--------|-----------|
| PA14_37990 | PA2050 |             | probable sigma-70 factor, ECF subfamily                                                           | 11.533 | 4.702E-02 |
| PA14_36680 | PA2156 |             | conserved hypothetical protein                                                                    | 4.911  | 2.013E-02 |
| PA14_36150 | PA2208 |             | hypothetical protein                                                                              | 18.154 | 5.043E-02 |
| PA14_35590 | PA2243 | <i>pslM</i> | hypothetical protein                                                                              | 4.905  | 2.597E-05 |
| PA14_35460 | PA2252 |             | probable AGCS sodium/alanine/glycine symporter                                                    | 7.640  | 3.958E-24 |
| PA14_34730 | PA2312 |             | probable transcriptional regulator                                                                | 7.433  | 2.855E-02 |
| PA14_33680 | PA2398 | <i>fpvA</i> | ferripyoverdine receptor                                                                          | 5.544  | 1.320E-04 |
| PA14_33600 | PA2403 |             | hypothetical protein                                                                              | 4.875  | 2.831E-04 |
| PA14_33590 | PA2404 |             | hypothetical protein                                                                              | 10.421 | 3.925E-10 |
| PA14_33580 | PA2405 |             | hypothetical protein                                                                              | 7.315  | 1.502E-04 |
| PA14_33570 | PA2406 |             | hypothetical protein                                                                              | 8.390  | 4.476E-04 |
| PA14_33560 | PA2407 |             | probable adhesion protein                                                                         | 11.858 | 4.209E-16 |
| PA14_33550 | PA2408 |             | probable ATP-binding component of ABC transporter                                                 | 14.889 | 3.291E-09 |
| PA14_33540 | PA2409 |             | probable permease of ABC transporter                                                              | 8.351  | 5.755E-09 |
| PA14_33530 | PA2410 |             | hypothetical protein                                                                              | 6.664  | 3.661E-08 |
| PA14_33380 | PA2421 |             | hypothetical protein                                                                              | 5.249  | 3.061E-05 |
| PA14_32780 | PA2463 |             | hypothetical protein                                                                              | 2.155  | 4.607E-05 |
| PA14_32470 | PA2487 |             | hypothetical protein                                                                              | 3.718  | 1.668E-02 |
| PA14_32400 | PA2493 | <i>mexE</i> | Resistance-Nodulation-Cell Division (RND) multidrug efflux membrane fusion protein MexE precursor | 4.007  | 1.286E-03 |
| PA14_      | PA2593 |             | quorum threshold                                                                                  | 2.629  | 1.773E-05 |

|            |        |              |                                                |        |           |
|------------|--------|--------------|------------------------------------------------|--------|-----------|
| 30560      |        |              | expression element,<br>QteE                    |        |           |
| PA14_30430 | PA2603 |              | probable thiosulfate<br>sulfurtransferase      | 4.033  | 1.404E-14 |
| PA14_30240 | PA2619 | <i>infA</i>  | initiation factor                              | 2.396  | 1.825E-03 |
| PA14_30030 | PA2636 |              | hypothetical protein                           | 2.723  | 1.107E-02 |
| PA14_29800 | PA2652 |              | methyl-accepting<br>chemotaxis protein         | 2.393  | 7.536E-07 |
| PA14_29770 | PA2653 |              | probable transporter                           | 8.117  | 3.276E-18 |
| PA14_29690 | PA2660 |              | hypothetical protein                           | 2.955  | 9.786E-08 |
| PA14_27370 | PA2840 |              | probable ATP-<br>dependent RNA<br>helicase     | 6.599  | 1.327E-17 |
| PA14_25630 | PA2970 | <i>rpmF</i>  | 50S ribosomal protein<br>L32                   | 2.448  | 1.234E-08 |
| PA14_25620 | PA2971 |              | conserved hypothetical<br>protein              | 4.235  | 7.892E-09 |
| PA14_25270 | PA3000 | <i>aroP1</i> | aromatic amino acid<br>transport protein AroP1 | 2.410  | 8.833E-08 |
| PA14_24860 | PA3032 | <i>snr1</i>  | cytochrome c Snr1                              | 3.979  | 1.763E-02 |
| PA14_23610 | PA3132 |              | probable hydrolase                             | 2.542  | 2.928E-02 |
| PA14_23590 | PA3133 |              | probable transcriptional<br>regulator          | 3.999  | 1.329E-08 |
| PA14_23110 | PA3179 |              | conserved hypothetical<br>protein              | 3.860  | 1.457E-15 |
| PA14_22700 | PA3209 |              | conserved hypothetical<br>protein              | 3.099  | 2.649E-02 |
| PA14_21230 | PA3308 | <i>hepA</i>  | RNA helicase HepA                              | 2.044  | 2.461E-05 |
| PA14_20470 | PA3370 |              | hypothetical protein                           | 2.416  | 2.541E-02 |
| PA14_19470 | PA3452 | <i>mgoA</i>  | malate:quinone<br>oxidoreductase               | 2.767  | 2.073E-05 |
| PA14_18150 | PA3568 |              | probable acetyl-coa<br>synthetase              | 2.087  | 1.573E-03 |
| PA14_17910 | PA3586 |              | probable hydrolase                             | 2.058  | 4.658E-03 |
| PA14_      | PA3607 | <i>potA</i>  | polyamine transport                            | 16.369 | 4.187E-21 |

|            |        |             |                                               |       |           |
|------------|--------|-------------|-----------------------------------------------|-------|-----------|
| 17640      |        |             | protein PotA                                  |       |           |
| PA14_17630 | PA3608 | <i>potB</i> | polyamine transport protein PotB              | 8.161 | 1.033E-25 |
| PA14_17620 | PA3609 | <i>potC</i> | polyamine transport protein PotC              | 6.534 | 3.667E-07 |
| PA14_17610 | PA3610 | <i>potD</i> | polyamine transport protein PotD              | 6.329 | 1.253E-09 |
| PA14_17280 | PA3638 |             | conserved hypothetical protein                | 2.421 | 2.353E-05 |
| PA14_17250 | PA3641 |             | probable amino acid permease                  | 2.019 | 8.521E-05 |
| PA14_16210 | PA3726 |             | conserved hypothetical protein                | 3.786 | 2.779E-11 |
| PA14_16010 | PA3741 |             | hypothetical protein                          | 4.642 | 1.576E-15 |
| PA14_15990 | PA3743 | <i>trmD</i> | tRNA (guanine-N1)-methyltransferase           | 3.426 | 2.286E-05 |
| PA14_15970 | PA3745 | <i>rpsP</i> | 30S ribosomal protein S16                     | 3.840 | 2.019E-08 |
| PA14_15700 | PA3766 |             | probable aromatic amino acid transporter      | 2.406 | 5.628E-04 |
| PA14_14680 | PA3818 |             | extragenic suppressor protein SuhB            | 4.241 | 2.395E-18 |
| PA14_14610 | PA3822 | <i>yajC</i> | conserved hypothetical protein                | 2.528 | 2.135E-10 |
| PA14_14330 | PA3842 |             | specific Pseudomonas chaperone for ExoS, SpcS | 2.016 | 1.609E-02 |
| PA14_12550 | PA3967 |             | hypothetical protein                          | 4.786 | 1.695E-11 |
| PA14_12360 | PA3979 |             | hypothetical protein                          | 6.770 | 1.897E-25 |
| PA14_12180 | PA3990 |             | conserved hypothetical protein                | 3.491 | 6.320E-04 |
| PA14_12170 | PA3991 |             | hypothetical protein                          | 3.315 | 4.195E-03 |
| PA14_11580 | PA4041 |             | hypothetical protein                          | 5.610 | 1.732E-17 |
| PA14_11530 | PA4045 |             | conserved hypothetical protein                | 2.700 | 1.412E-06 |
| PA14_09880 | PA4177 |             | hypothetical protein                          | 4.337 | 1.011E-02 |
| PA14_09880 | PA4179 |             | probable porin                                | 5.604 | 3.424E-18 |



|            |        |             |                                                       |        |           |
|------------|--------|-------------|-------------------------------------------------------|--------|-----------|
| 09850      |        |             |                                                       |        |           |
| PA14_09680 | PA4197 |             | BfiS                                                  | 4.014  | 1.843E-13 |
| PA14_09660 | PA4198 |             | probable AMP-binding enzyme                           | 17.466 | 6.603E-06 |
| PA14_09630 | PA4199 |             | probable acyl-CoA dehydrogenase                       | 6.505  | 2.398E-09 |
| PA14_56040 | PA4312 |             | conserved hypothetical protein                        | 2.053  | 1.139E-03 |
| PA14_56480 | PA4344 |             | probable hydrolase                                    | 3.211  | 1.523E-06 |
| PA14_57650 | PA4438 |             | conserved hypothetical protein                        | 2.732  | 4.348E-05 |
| PA14_58150 | PA4481 | <i>mreB</i> | rod shape-determining protein MreB                    | 2.098  | 2.165E-05 |
| PA14_58580 | PA4515 |             | conserved hypothetical protein                        | 3.790  | 5.833E-06 |
| PA14_58600 | PA4516 |             | hypothetical protein                                  | 2.426  | 2.094E-03 |
| PA14_60400 | PA4563 | <i>rpsT</i> | 30S ribosomal protein S20                             | 2.890  | 1.176E-03 |
| PA14_60520 | PA4573 |             | hypothetical protein                                  | 3.098  | 1.396E-04 |
| PA14_60530 | PA4574 |             | conserved hypothetical protein                        | 4.488  | 1.822E-05 |
| PA14_61190 | PA4624 |             | cyclic diguanylate-regulated TPS partner B, CdrB      | 2.573  | 5.575E-07 |
| PA14_61200 | PA4625 |             | cyclic diguanylate-regulated TPS partner A, CdrA      | 3.808  | 8.672E-16 |
| PA14_61260 | PA4629 |             | hypothetical protein                                  | 3.676  | 3.760E-03 |
| PA14_61370 | PA4637 |             | hypothetical protein                                  | 2.497  | 3.984E-02 |
| PA14_61460 | PA4645 |             | probable purine/pyrimidine phosphoribosyl transferase | 3.758  | 6.037E-06 |
| PA14_61750 | PA4669 | <i>ipk</i>  | isopentenyl monophosphate kinase                      | 4.360  | 1.383E-04 |
| PA14_61770 | PA4670 | <i>prs</i>  | ribose-phosphate pyrophosphokinase                    | 2.432  | 1.894E-06 |
| PA14_61770 | PA4684 |             | hypothetical protein                                  | 2.136  | 1.483E-05 |

---

|            |        |             |                                                      |       |           |
|------------|--------|-------------|------------------------------------------------------|-------|-----------|
| 61960      |        |             |                                                      |       |           |
| PA14_62440 | PA4719 |             | probable transporter                                 | 2.769 | 9.458E-09 |
| PA14_62510 | PA4724 |             | probable aminoacyl-transfer RNA synthetase (class I) | 2.631 | 5.540E-07 |
| PA14_62740 | PA4743 | <i>rbfA</i> | ribosome-binding factor A                            | 2.372 | 6.394E-06 |
| PA14_62780 | PA4746 |             | conserved hypothetical protein                       | 5.094 | 2.672E-03 |
| PA14_62830 | PA4748 | <i>tpiA</i> | triosephosphate isomerase                            | 3.372 | 2.017E-03 |
| PA14_63060 | PA4768 | <i>smpB</i> | SmpB protein                                         | 2.679 | 1.690E-09 |
| PA14_63080 | PA4770 | <i>lldP</i> | L-lactate permease                                   | 9.218 | 5.879E-22 |
| PA14_63090 | PA4771 | <i>lldD</i> | L-lactate dehydrogenase                              | 7.641 | 3.066E-10 |
| PA14_63100 | PA4772 |             | probable ferredoxin                                  | 6.952 | 5.458E-09 |
| PA14_64000 | PA4840 |             | conserved hypothetical protein                       | 6.257 | 5.591E-18 |
| PA14_64450 | PA4873 |             | probable heat-shock protein                          | 4.153 | 2.232E-14 |
| PA14_65400 | PA4950 |             | conserved hypothetical protein                       | 6.087 | 7.744E-24 |
| PA14_67320 | PA5098 | <i>hutH</i> | histidine ammonia-lyase                              | 2.677 | 3.275E-05 |
| PA14_67350 | PA5100 | <i>hutU</i> | urocanase                                            | 3.346 | 5.654E-05 |
| PA14_67370 | PA5101 |             | hypothetical protein                                 | 3.993 | 5.226E-04 |
| PA14_67380 | PA5102 |             | hypothetical protein                                 | 5.000 | 2.382E-02 |
| PA14_67400 | PA5103 |             | PuuR                                                 | 6.182 | 1.204E-02 |
| PA14_67580 | PA5118 | <i>thiI</i> | thiazole biosynthesis protein ThiI                   | 4.451 | 6.957E-20 |
| PA14_67750 | PA5130 |             | conserved hypothetical protein                       | 2.869 | 2.053E-07 |
| PA14_68440 | PA5181 |             | probable oxidoreductase                              | 3.749 | 1.900E-08 |
| PA14_69780 | PA5286 |             | conserved hypothetical protein                       | 2.883 | 1.410E-03 |

---

|            |        |             |                                                   |        |           |
|------------|--------|-------------|---------------------------------------------------|--------|-----------|
| PA14_70170 | PA5314 |             | hypothetical protein                              | 4.626  | 4.147E-12 |
| PA14_70510 | PA5341 |             | hypothetical protein                              | 4.243  | 5.545E-06 |
| PA14_71750 | PA5437 |             | probable transcriptional regulator                | 3.049  | 1.652E-10 |
| PA14_71890 | PA5445 |             | probable coenzyme A transferase                   | 6.005  | 1.089E-17 |
| PA14_72340 | PA5479 | <i>glpP</i> | proton-glutamate symporter                        | 5.545  | 4.373E-26 |
| PA14_72620 | PA5503 | <i>metN</i> | probable ATP-binding component of ABC transporter | 5.999  | 3.904E-02 |
| PA14_72650 | PA5506 |             | hypothetical protein                              | 21.762 | 7.530E-17 |
| PA14_72660 | PA5507 |             | hypothetical protein                              | 7.856  | 1.807E-21 |
| PA14_72690 | PA5508 |             | Glutamylpolyamine synthetase homologue            | 7.822  | 4.453E-24 |
| PA14_72700 | PA5509 |             | hypothetical protein                              | 6.148  | 2.881E-16 |
| PA14_72710 | PA5510 |             | probable transporter                              | 2.759  | 2.538E-08 |
| PA14_72970 | PA5531 | <i>tonB</i> | TonB1                                             | 2.847  | 2.928E-02 |
| PA14_27190 |        |             | tRNA-Ser                                          | 26.828 | 1.707E-02 |
| PA14_54840 |        |             | tRNA-Gly                                          | 9.758  | 6.540E-12 |
| PA14_60160 |        |             | tRNA-Pro                                          | 9.338  | 1.182E-02 |
| PA14_28750 |        |             | hypothetical protein                              | 9.071  | 1.654E-05 |
| PA14_41290 |        |             | hypothetical protein                              | 7.188  | 1.582E-02 |
| PA14_51650 |        |             | integrase                                         | 7.153  | 5.929E-05 |
| PA14_54850 |        |             | hypothetical protein                              | 6.875  | 1.633E-13 |
| PA14_22160 |        |             | hypothetical protein                              | 5.973  | 1.203E-04 |
| PA14_61760 |        |             | tRNA-Gln                                          | 5.803  | 5.318E-06 |
| PA14_      |        |             | TrbI-like protein                                 | 5.210  | 2.222E-10 |

---

|            |                |                                                                               |       |           |
|------------|----------------|-------------------------------------------------------------------------------|-------|-----------|
| 30850      |                |                                                                               |       |           |
| PA14_14320 |                | hypothetical protein                                                          | 4.576 | 8.876E-05 |
| PA14_27630 |                | protein associated with synthesis and assembly of refractile inclusion bodies | 4.470 | 2.353E-05 |
| PA14_59510 |                | hypothetical protein                                                          | 4.311 | 2.198E-06 |
| PA14_40340 |                | hypothetical protein                                                          | 4.304 | 4.927E-09 |
| PA14_59520 | Synonym: RL065 | hypothetical protein                                                          | 2.854 | 1.222E-05 |
| PA14_22230 |                | hypothetical protein                                                          | 2.778 | 6.466E-04 |
| PA14_59470 |                | hypothetical protein                                                          | 2.640 | 2.519E-06 |
| PA14_22190 |                | hypothetical protein                                                          | 2.550 | 1.680E-07 |
| PA14_55040 |                | ferric enterobactin transporter ATP-binding protein                           | 2.329 | 6.306E-03 |
| PA14_59480 |                | hypothetical protein                                                          | 2.304 | 1.176E-03 |
| PA14_28260 |                | hypothetical protein                                                          | 2.162 | 2.670E-03 |
| PA14_71760 |                | hypothetical protein                                                          | 2.153 | 1.153E-02 |

---
